# Supplementary material
Source: publisher figshare collection journal article supplement (https://karger.figshare.com/articles/dataset/_/5122876)
Supplement: Supplementary file 2 [file 1]

**Table-1 Reported Cases of Primary SCC of the Urethra**

| <b>Author</b>       | <b>Age/Sex</b> | <b>Presenting complaint</b> | <b>Location</b>                                               | <b>Management</b>                                                                                                    | <b>Follow-up</b>                                            |
|---------------------|----------------|-----------------------------|---------------------------------------------------------------|----------------------------------------------------------------------------------------------------------------------|-------------------------------------------------------------|
| Vadmal et al. [15]  | 57/M           | Hematuria                   | Distal urethra                                                | Distal penectomy and right inguinal node excision.                                                                   | Alive, no evidence of disease after 5 months follow-up.     |
| Parekh et al. [14]  | 63/M           | Hematuria                   | Distal urethra                                                | Distal urethrectomy with partial resection of the corpus cavernosa, perineal urethrostomy and adjuvant chemotherapy. | Alive, lymph node metastasis while receiving chemotherapy.  |
| Rudolff et al. [13] | 64/M           | Voiding difficulty          | Proximal urethra with inguinal and intra-abdominal metastasis | Cisplatin based chemotherapy.                                                                                        | Died 8 months after initial presentation due to metastasis. |
| Altintas et al. [2] | 57/M           | Painful inguinal mass       | Distal urethra                                                | Distal penectomy with left inguinal node excision and cisplatin based chemotherapy.                                  | Died 35 months after initial presentation.                  |
| Yoo et al. [11]     | 69/F           | Voiding difficulty          | Distal urethra                                                | Distal urethrectomy and cisplatin based chemotherapy.                                                                | N/A.                                                        |
| Present Case        | 89/M           | Voiding difficulty          | Bulbar urethra                                                | Chemotherapy                                                                                                         | Disease free after 6 months follow-up.                      |
